# Supplementary material for: Switchgrass Genomic Diversity, Ploidy, and Evolution: Novel Insights from a Network-Based SNP Discovery Protocol
Source: PLOS journal article supplement (doi:10.1371/journal.pgen.1003215), 2013-01-17
Supplement: S17 (10.1371/journal.pgen.1003215.s017) [file journal.pgen.1003215.s017]

**Table S3.** Quality of linkage group clustering at different call rates.

| Call rate | Number of SNPs | Number of uniquely aligned SNPs | Proportion* |
|-----------|----------------|---------------------------------|-------------|
| 0.2       | 178,373        | 10,704                          | 60.3%       |
| 0.5       | 88,217         | 9,437                           | 76.8%       |
| 0.9       | 16,700         | 1,809                           | 90.8%       |

SNPs ( $0.12 < \text{MAF} < 0.38$ ) at different call rates in the full-sib population were aligned to the foxtail millet genome. The uniquely aligned SNPs were clustered into the 36 linkage groups (paternal and maternal) based on the Spearman's rank correlation coefficient of the markers.

\* The proportion of uniquely aligned SNPs which were clustered into the syntenic linkage groups corresponding to a physical chromosome in foxtail millet.
